# Supplementary material for: Rewetting of Three Drained Peatlands Drives Congruent Compositional Changes in Pro- and Eukaryotic Soil Microbiomes Through Environmental Filtering
Source: bioRxiv or medRxiv preprint supplement (doi:10.1101/848192), 2020-02-17
Supplement: Supplementary file [file media-1.pdf]

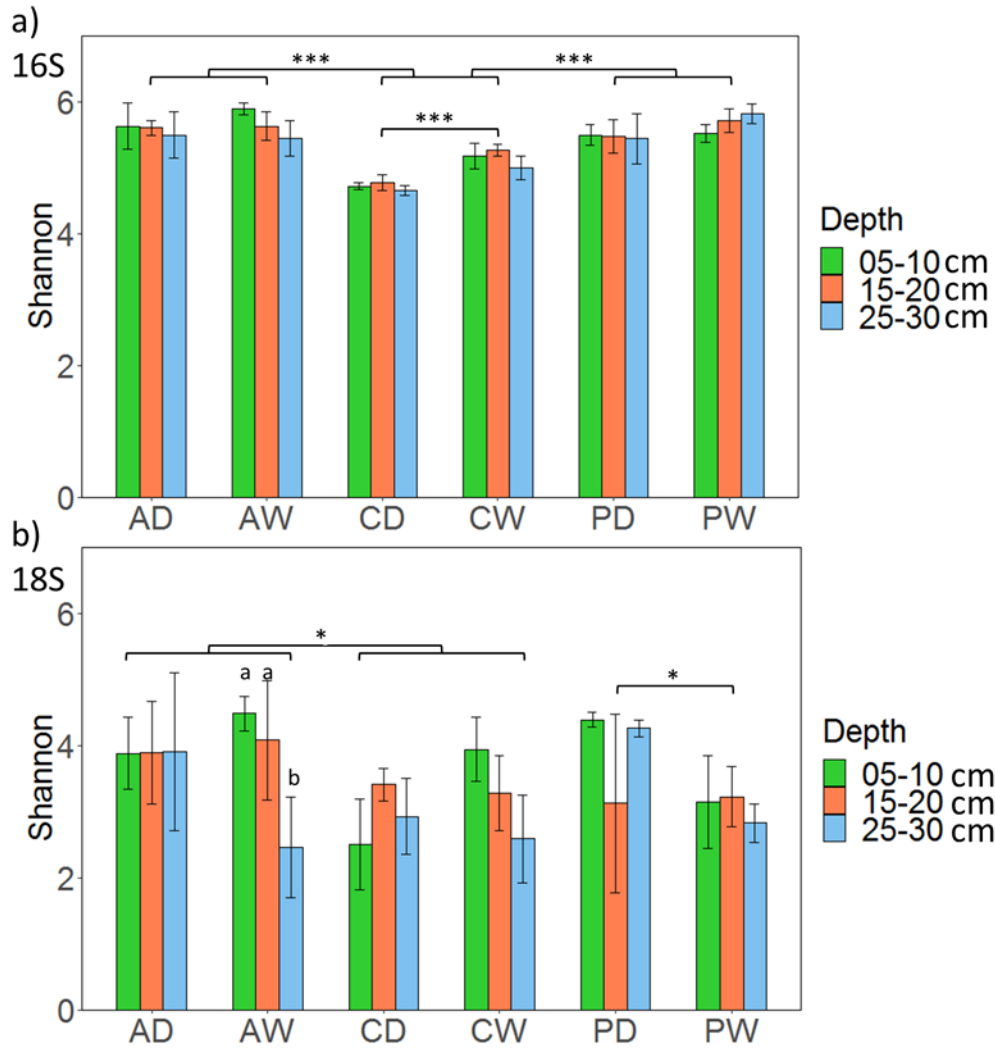

1

2 Figure S1: Alpha diversity of fen microbiomes. a: prokaryotes: Shannon entropy of 16S rRNA amplicon  
 3 sequencing ASV, bars show triplicates of cores, error bars indicate standard deviation between cores,  
 4 b: eukaryotes: Shannon entropy of 18S rRNA amplicon sequencing ASV, bars show triplicates of cores,  
 5 error bars indicate standard deviation between cores. A: Alder carr, C: coastal fen, P: percolation fen,  
 6 D: drained, W: rewetted, depth in cm. Values are means of triplicate peat-cores. Kruskal-Wallis Test:  
 7 \*\*\* significance level at  $p < 0.001$ ; \* significance level at  $p < 0.05$ , Pairwise T-test: significant difference  
 8 between a and b.

9

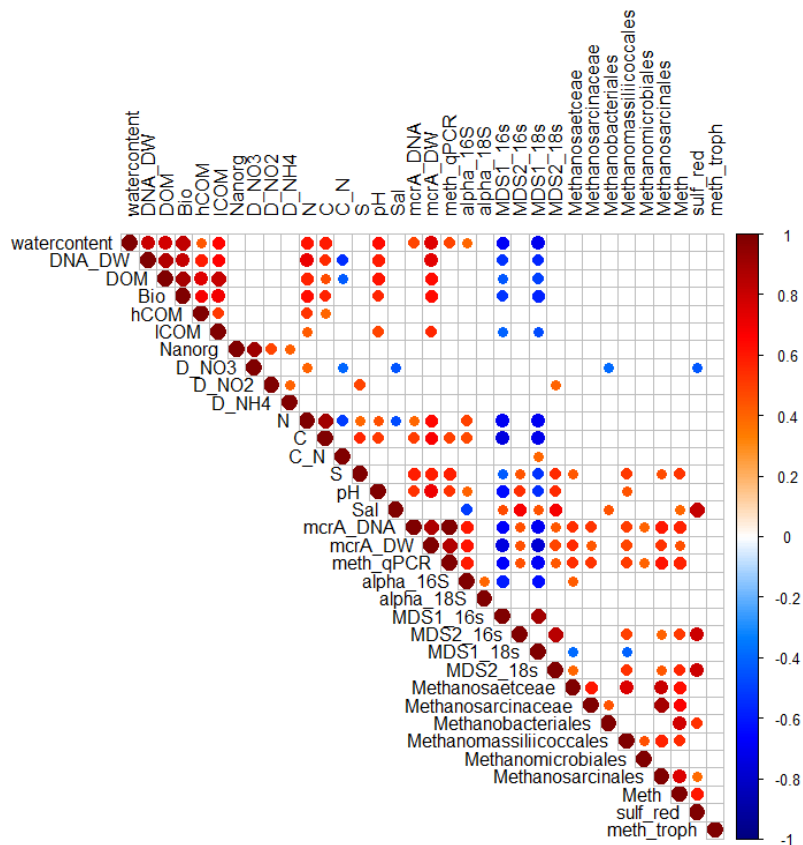

10

11 Figure S2: Heatmap showing Spearman correlation between microbial community factors and soil  
 12 parameters. Spearman correlation analysis between soil properties, alpha diversity, NMDS axes and  
 13 abundances of functional groups and methanogenic orders. Color and size of points indicate  
 14 coefficients, red indicate negative correlation, blue indicate positive correlation, the bigger the  
 15 symbols the stronger the correlation. Water: gravimetric water content; DNA\_DW:  $\mu\text{g}$  DNA per gram  
 16 dry soil; DOM: dissolved organic matter; Bio: Biopolymers; hCOM: humic carbon organic matter;  
 17 ICOM: low-molecular organic matter; Nanorg: anorganic nitrogen; D\_NO3: dissolved nitrate;  
 18 D\_NO2:dissolved nitrite; D\_NH4: dissolved Ammonia; N: total nitrogen; C: total carbon; C\_N:  
 19 carbon/nitrogen ratio; S: total sulfur; pH: pH from calcium chloride extracts;  
 20 Sal: salinity; mcrA\_DNA: mcrA gene copies per ng DNA; mcrA\_DW: mcrA gene copies per gram dry  
 21 soil; alpha\_16S/18S: alpha diversity of prokaryotic/eukaryotic community; MDS: multi-dimensional-  
 22 scaling axis 1/2 for prokaryotes/eukaryotes; meth: relative abundance of methanogen; sulf\_red:  
 23 relative abundance of sulfate reducers; meth\_troph: relative abundance of methanotrophs.

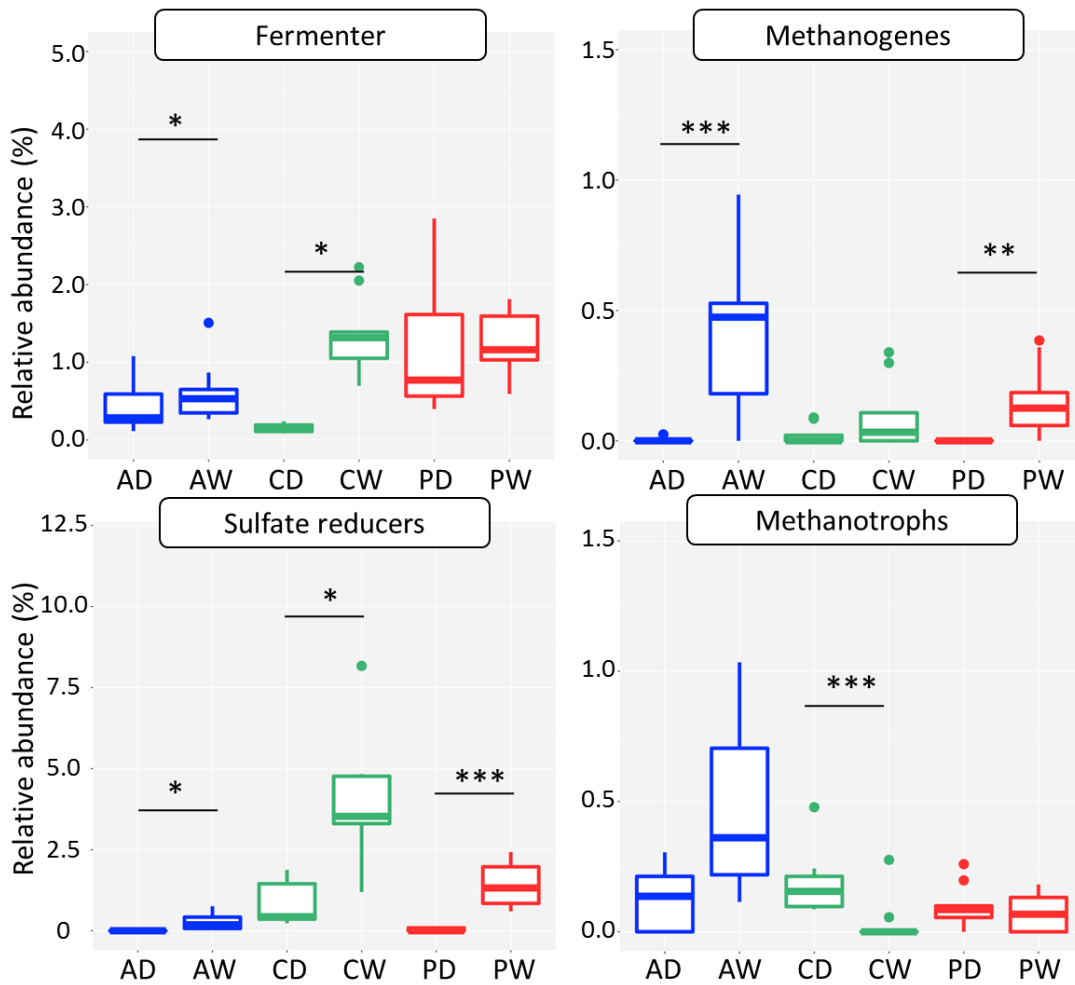

24

25 Figure S3. Relative abundance of functional groups in 16S rRNA gene amplicon datasets. Boxplots  
 26 shows relative abundance in depth and triplicate samples. X-axes represent fen type: alder carr (A),  
 27 coastal fen (C), percolation fen (P), hydrological state drained (D) and rewetted (W), depth in cm (05,  
 28 15, 25).

29

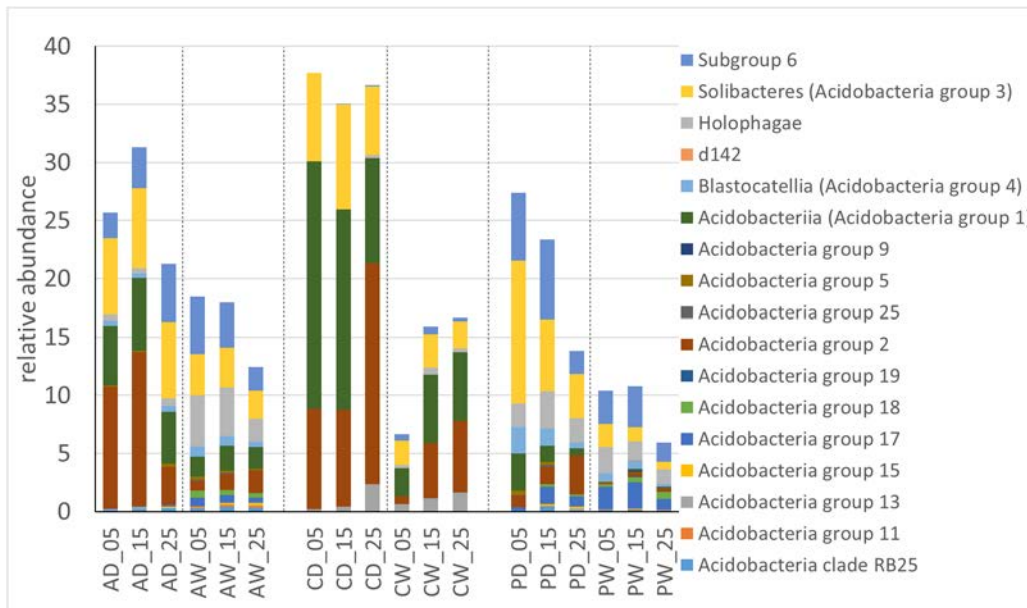

30

31 Figure S4 Relative abundance of Acidobacteria in 16S rRNA gene amplicon datasets. Barplots show  
 32 relative abundance. X-axes represent fen type: alder carr (A), coastal fen (C), percolation fen (P),  
 33 hydrological state drained (D) and rewetted (W), depth in cm (05, 15, 25). Data are shown as mean  
 34 values of triplicate soil cores.

35

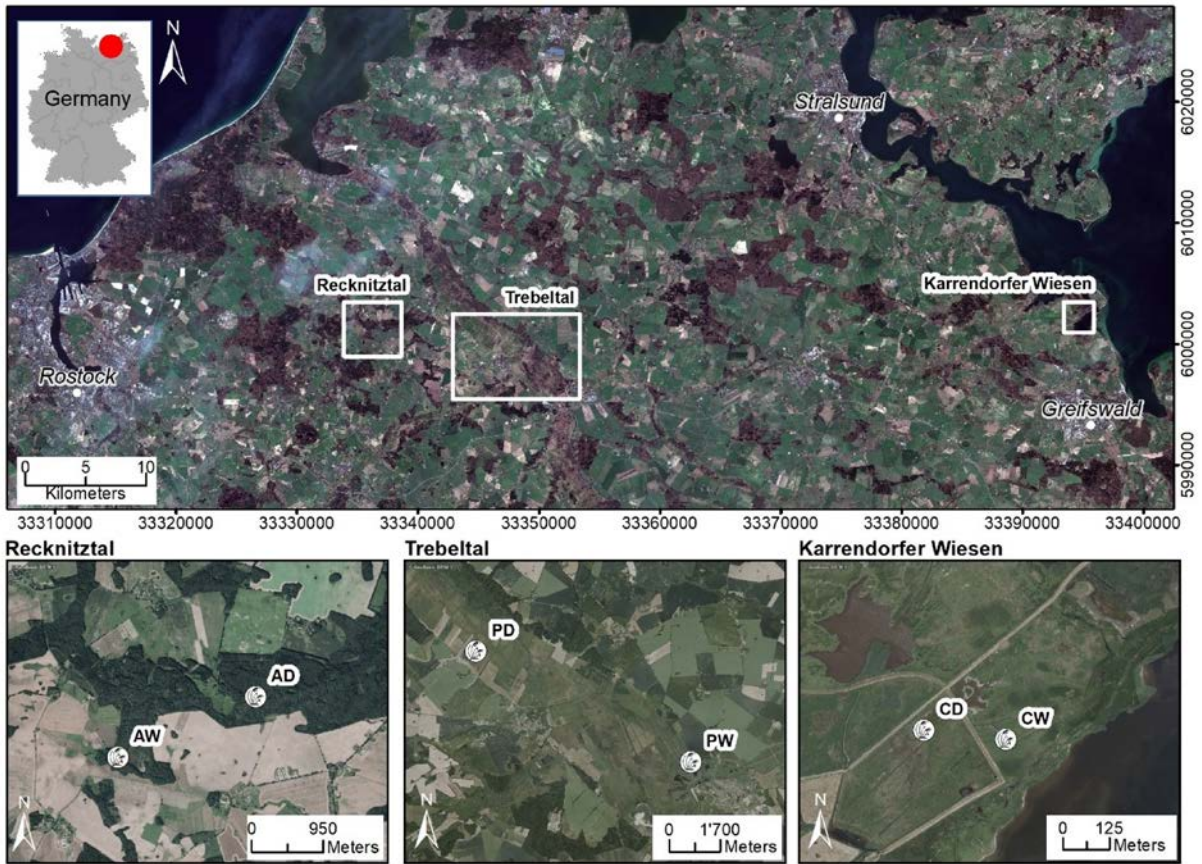

36

37 Figure S5: Overview of sampling sites. A: alder carr; P: percolation fen; C: coastal fen; D: drained; W:  
 38 rewetted.

39

40
