# Supplementary material for: Rewetting of Three Drained Peatlands Drives Congruent Compositional Changes in Pro- and Eukaryotic Soil Microbiomes Through Environmental Filtering
Source: bioRxiv or medRxiv preprint supplement (doi:10.1101/848192), 2020-02-17
Supplement: Supplementary file [file media-2.pdf]

Table S1: Biotic and abiotic soil parameters. Abbreviations: Code: site, status, core number and depth specific code; Alder: alder swamp; Coast: coastal mire; Perco: percolation mire; dry: drained; wet: rewetted; 05, 15, 25: sampling depth in cm; moisture: gravimetric soil water content in %; DNA\_DW: extracted  $\mu\text{g}$  DNA per gram dry weight; DOM: dissolved organic matter in  $\mu\text{g C/g}$  dry soil; Bio: biopolymers in  $\mu\text{g C/g}$  dry soil; hCOM: high molecular carbon organic matter in  $\mu\text{g C/g}$  dry soil; lCOM: low molecular carbon organic matter in  $\mu\text{g C/g}$  dry soil; N: concentration of nitrogen in %; C: concentration of carbon in %; C\_N: C/N ratio; S: concentration of sulfur in %, pHCaCl2: pH from  $\text{CaCl}_2$  soil extracts; Sal: salinity; mcrA\_DW: *mcrA* gene abundance per gram dry soil; Std\_dev: Standard deviation of four technical replicate qPCR measurements.

| Code           | moisture | DNA_DW | DOM  | Bio | hCOM | lCOM | N    | C    | C_N  | S    | pHCaCl2 | Sal  | mcrA_DW  | Std_dev        |
|----------------|----------|--------|------|-----|------|------|------|------|------|------|---------|------|----------|----------------|
| Alder_dry_1_05 | 55.4     | 32.8   | 522  | 35  | 233  | 135  | 1.27 | 16.4 | 12.9 | 0.29 | 4.20    | 0.08 | 1.21E+06 | $\pm$ 6.66E+04 |
| Alder_dry_1_15 | 48.8     | 21.2   | 291  | 25  | 138  | 85   | 0.92 | 12.9 | 14.0 | 0.24 | 4.33    | 0.08 | 1.24E+06 | $\pm$ 9.92E+04 |
| Alder_dry_1_25 | 47.8     | 33.4   | 371  | 32  | 195  | 79   | 1.98 | 29.5 | 14.9 | 0.55 | 4.72    | 0.08 | 6.67E+05 | $\pm$ 7.08E+04 |
| Alder_dry_2_05 | 42.0     | 36.9   | 396  | 24  | 215  | 75   | 1.27 | 16.4 | 12.9 | 0.29 | 4.20    | 0.08 | 7.09E+05 | $\pm$ 5.13E+03 |
| Alder_dry_2_15 | 36.0     | 25.4   | 368  | 21  | 162  | 68   | 0.92 | 12.9 | 14.0 | 0.24 | 4.33    | 0.08 | 5.41E+05 | $\pm$ 1.31E+03 |
| Alder_dry_2_25 | 37.2     | 27.7   | 535  | 41  | 247  | 148  | 1.98 | 29.5 | 14.9 | 0.55 | 4.72    | 0.08 | 6.29E+05 | $\pm$ 0.00E+00 |
| Alder_dry_3_05 | 45.9     | 21.3   | 408  | 25  | 140  | 172  | 1.27 | 16.4 | 12.9 | 0.29 | 4.20    | 0.08 | 6.56E+05 | $\pm$ 4.92E+04 |
| Alder_dry_3_15 | 45.0     | 16.6   | 180  | 14  | 81   | 47   | 0.92 | 12.9 | 14.0 | 0.24 | 4.33    | 0.08 | 6.76E+05 | $\pm$ 5.12E+04 |
| Alder_dry_3_25 | 58.3     | 51.1   | 367  | 32  | 177  | 77   | 1.98 | 29.5 | 14.9 | 0.55 | 4.72    | 0.08 | 1.30E+06 | $\pm$ 1.27E+05 |
| Alder_wet_1_05 | 89.7     | 167    | 1289 | 250 | 539  | 335  | 2.77 | 34.0 | 12.3 | 0.55 | 5.07    | 0.33 | 7.59E+07 | $\pm$ 6.28E+06 |
| Alder_wet_1_15 | 76.1     | 68.2   | 433  | 59  | 195  | 103  | 2.77 | 34.0 | 12.3 | 0.55 | 5.07    | 0.33 | 1.16E+07 | $\pm$ 2.54E+03 |
| Alder_wet_1_25 | 73.5     | 32.9   | 795  | 222 | 339  | 133  | 2.71 | 39.0 | 14.4 | 0.65 | 5.09    | 0.33 | 3.02E+06 | $\pm$ 4.30E+05 |
| Alder_wet_2_05 | 79.1     | 89.6   | 844  | 64  | 274  | 187  | 2.77 | 34.0 | 12.3 | 0.55 | 5.07    | 0.33 | 1.53E+07 | $\pm$ 7.85E+05 |
| Alder_wet_2_15 | 75.1     | 66.2   | 767  | 100 | 266  | 400  | 2.77 | 34.0 | 12.3 | 0.55 | 5.07    | 0.33 | 1.69E+06 | $\pm$ 8.75E+04 |
| Alder_wet_2_25 | 81.5     | 63.3   | 761  | 109 | 381  | 138  | 2.71 | 39.0 | 14.4 | 0.65 | 5.09    | 0.33 | 1.44E+06 | $\pm$ 2.81E+05 |
| Alder_wet_3_05 | 78.0     | 167.5  | 1025 | 178 | 555  | 138  | 2.77 | 34.0 | 12.3 | 0.55 | 5.07    | 0.33 | 6.18E+07 | $\pm$ 5.51E+06 |
| Alder_wet_3_15 | 74.9     | 78.4   | 630  | 96  | 302  | 141  | 2.77 | 34.0 | 12.3 | 0.55 | 5.07    | 0.33 | 1.02E+07 | $\pm$ 5.09E+05 |
| Alder_wet_3_25 | 80.3     | 52.1   | 791  | 91  | 350  | 171  | 2.71 | 39.0 | 14.4 | 0.65 | 5.09    | 0.33 | 6.68E+06 | $\pm$ 1.68E+05 |
| Coast_dry_1_05 | 44.2     | 19.2   | 422  | 54  | 182  | 91   | 1.59 | 21.7 | 13.6 | 0.59 | 3.85    | 1.32 | 4.29E+05 | $\pm$ 3.50E+04 |
| Coast_dry_1_15 | 62.4     | 30     | 470  | 58  | 218  | 100  | 1.17 | 15.1 | 12.9 | 0.59 | 4.05    | 1.32 | 4.20E+05 | $\pm$ 5.87E+04 |
| Coast_dry_1_25 | 91.0     | 74.9   | 1243 | 193 | 400  | 360  | 0.67 | 8.6  | 12.8 | 0.26 | 4.04    | 1.32 | 9.56E+05 | $\pm$ 2.59E+05 |
| Coast_dry_2_05 | 41.2     | 30.2   | 485  | 47  | 204  | 95   | 1.59 | 21.7 | 13.6 | 0.59 | 3.85    | 1.32 | 2.45E+05 | $\pm$ 4.45E+04 |
| Coast_dry_2_25 | 43.4     | 8.9    | 211  | 24  | 68   | 68   | 0.67 | 8.6  | 12.8 | 0.26 | 4.04    | 1.32 | 1.55E+05 | $\pm$ 7.36E+03 |
| Coast_dry_3_05 | 41.6     | 27.4   | 299  | 34  | 111  | 78   | 1.59 | 21.7 | 13.6 | 0.59 | 3.85    | 1.32 | 2.36E+05 | $\pm$ 2.73E+04 |
| Coast_dry_3_15 | 40.7     | 24.3   | 247  | 32  | 96   | 52   | 1.17 | 15.1 | 12.9 | 0.59 | 4.05    | 1.32 | 1.34E+05 | $\pm$ 3.57E+04 |
| Coast_dry_3_25 | 47.7     | 14.6   | 207  | 28  | 70   | 48   | 0.67 | 8.6  | 12.8 | 0.26 | 4.04    | 1.32 | 2.34E+05 | $\pm$ 5.44E+04 |
| Coast_wet_1_05 | 43.7     | 32.4   | 330  | 40  | 121  | 95   | 1.76 | 31.4 | 17.8 | 0.69 | 4.70    | 5.20 | 1.94E+06 | $\pm$ 1.79E+05 |
| Coast_wet_1_15 | 37.4     | 23.5   | 430  | 58  | 218  | 65   | 0.78 | 15.0 | 19.2 | 0.28 | 4.40    | 5.20 | 8.15E+05 | $\pm$ 3.27E+04 |
| Coast_wet_1_25 | 61.2     | 46.7   | 698  | 54  | 332  | 72   | 0.68 | 12.8 | 19.0 | 0.25 | 6.05    | 5.20 | 7.43E+05 | $\pm$ 5.32E+04 |
| Coast_wet_2_05 | 60.3     | 42.7   | 535  | 61  | 198  | 152  | 1.76 | 31.4 | 17.8 | 0.69 | 4.70    | 5.20 | 7.57E+06 | $\pm$ 1.06E+06 |
| Coast_wet_2_15 | 46.4     | 32.3   | 448  | 38  | 187  | 117  | 0.78 | 15.0 | 19.2 | 0.28 | 4.40    | 5.20 | 6.83E+05 | $\pm$ 3.09E+04 |
| Coast_wet_2_25 | 67.0     | 47.9   | 1050 | 73  | 393  | 393  | 0.68 | 12.8 | 19.0 | 0.25 | 6.05    | 5.20 | 9.91E+05 | $\pm$ 1.86E+05 |
| Coast_wet_3_05 | 54.5     | 54.1   | 550  | 44  | 223  | 114  | 1.76 | 31.4 | 17.8 | 0.69 | 4.70    | 5.20 | 2.20E+06 | $\pm$ 1.80E+05 |
| Coast_wet_3_15 | 45.7     | 36.7   | 418  | 63  | 223  | 78   | 0.78 | 15.0 | 19.2 | 0.28 | 4.40    | 5.20 | 5.95E+05 | $\pm$ 1.06E+05 |
| Coast_wet_3_25 | 68.1     | 42.8   | 763  | 77  | 368  | 172  | 0.68 | 12.8 | 19.0 | 0.25 | 6.05    | 5.20 | 5.97E+05 | $\pm$ 6.05E+04 |
| Perco_dry_1_05 | 62.4     | 95.9   | 825  | 88  | 477  | 173  | 3.41 | 37.3 | 10.9 | 0.49 | 4.98    | 0.11 | 1.40E+06 | $\pm$ 4.31E+05 |
| Perco_dry_1_15 | 73.6     | 110.5  | 1389 | 197 | 831  | 195  | 3.41 | 37.3 | 10.9 | 0.49 | 5.18    | 0.11 | 2.59E+06 | $\pm$ 2.48E+05 |
| Perco_dry_1_25 | 79.0     | 103.1  | 1024 | 175 | 606  | 229  | 3.07 | 43.6 | 14.2 | 0.50 | 5.20    | 0.11 | 7.22E+06 | $\pm$ 6.17E+05 |
| Perco_dry_2_05 | 71.4     | 102.3  | 938  | 91  | 486  | 97   | 3.41 | 37.3 | 10.9 | 0.49 | 4.98    | 0.11 | 1.18E+06 | $\pm$ 2.06E+05 |

|                |      |       |      |     |     |     |      |      |      |      |      |      |          |            |
|----------------|------|-------|------|-----|-----|-----|------|------|------|------|------|------|----------|------------|
| Perco_dry_2_15 | 75.4 | 117.9 | 944  | 113 | 530 | 124 | 3.41 | 37.3 | 10.9 | 0.49 | 5.18 | 0.11 | 2.08E+06 | ± 9.49E+04 |
| Perco_dry_2_25 | 78.4 | 73.7  | 810  | 97  | 419 | 105 | 3.07 | 43.6 | 14.2 | 0.50 | 5.20 | 0.11 | 2.11E+06 | ± 2.99E+06 |
| Perco_dry_3_05 | 71.6 | 125.6 | 817  | 86  | 441 | 118 | 3.41 | 37.3 | 10.9 | 0.49 | 4.98 | 0.11 | 2.33E+06 | ± 6.58E+05 |
| Perco_dry_3_15 | 76.6 | 181.4 | 1139 | 147 | 621 | 165 | 3.41 | 37.3 | 10.9 | 0.49 | 5.18 | 0.11 | 1.06E+07 | ± 7.81E+04 |
| Perco_dry_3_25 | 79.8 | 117.1 | 1143 | 132 | 647 | 156 | 3.07 | 43.6 | 14.2 | 0.50 | 5.20 | 0.11 | 9.50E+06 | ± 2.18E+06 |
| Perco_wet_1_05 | 83.5 | 195.4 | 1195 | 103 | 79  | 339 | 2.64 | 31.1 | 11.8 | 0.86 | 5.36 | 0.49 | 4.06E+07 | ± 2.06E+06 |
| Perco_wet_1_15 | 76.7 | 102.9 | 739  | 86  | 83  | 154 | 2.64 | 31.1 | 11.8 | 0.86 | 5.36 | 0.49 | 5.45E+07 | ± 6.35E+06 |
| Perco_wet_1_25 | 79.6 | 51.5  | 526  | 91  | 48  | 113 | 2.66 | 46.4 | 17.4 | 1.01 | 5.39 | 0.49 | 1.81E+07 | ± 3.02E+06 |
| Perco_wet_2_05 | 82.2 | 171.5 | 980  | 136 | 106 | 127 | 2.64 | 31.1 | 11.8 | 0.86 | 5.36 | 0.49 | 1.60E+07 | ± 1.33E+06 |
| Perco_wet_2_15 | 69.4 | 61.8  | 672  | 58  | 63  | 227 | 2.64 | 31.1 | 11.8 | 0.86 | 5.36 | 0.49 | 2.25E+07 | ± 1.22E+06 |
| Perco_wet_2_25 | 71.7 | 41.3  | 481  | 47  | 192 | 103 | 2.66 | 46.4 | 17.4 | 1.01 | 5.39 | 0.49 | 3.90E+07 | ± 6.14E+05 |
| Perco_wet_3_05 | 76.3 | 137.4 | 1682 | 104 | 782 | 351 | 2.64 | 31.1 | 11.8 | 0.86 | 5.36 | 0.49 | 4.92E+07 | ± 8.11E+06 |
| Perco_wet_3_15 | 71.0 | 81.3  | 1192 | 117 | 538 | 290 | 2.64 | 31.1 | 11.8 | 0.86 | 5.36 | 0.49 | 4.87E+07 | ± 1.27E+07 |
| Perco_wet_3_25 | 68.3 | 24.6  | 474  | 54  | 194 | 85  | 2.66 | 46.4 | 17.4 | 1.01 | 5.39 | 0.49 | 1.82E+07 | ± 1.83E+06 |
